# Supplementary figures and images for: Objective measurement of lung volume recruitment therapy: laboratory and clinical validation
Source: HighWire-hosted journal article supplement (doi:10.1136/bmjresp-2021-000918), 2021-07-01

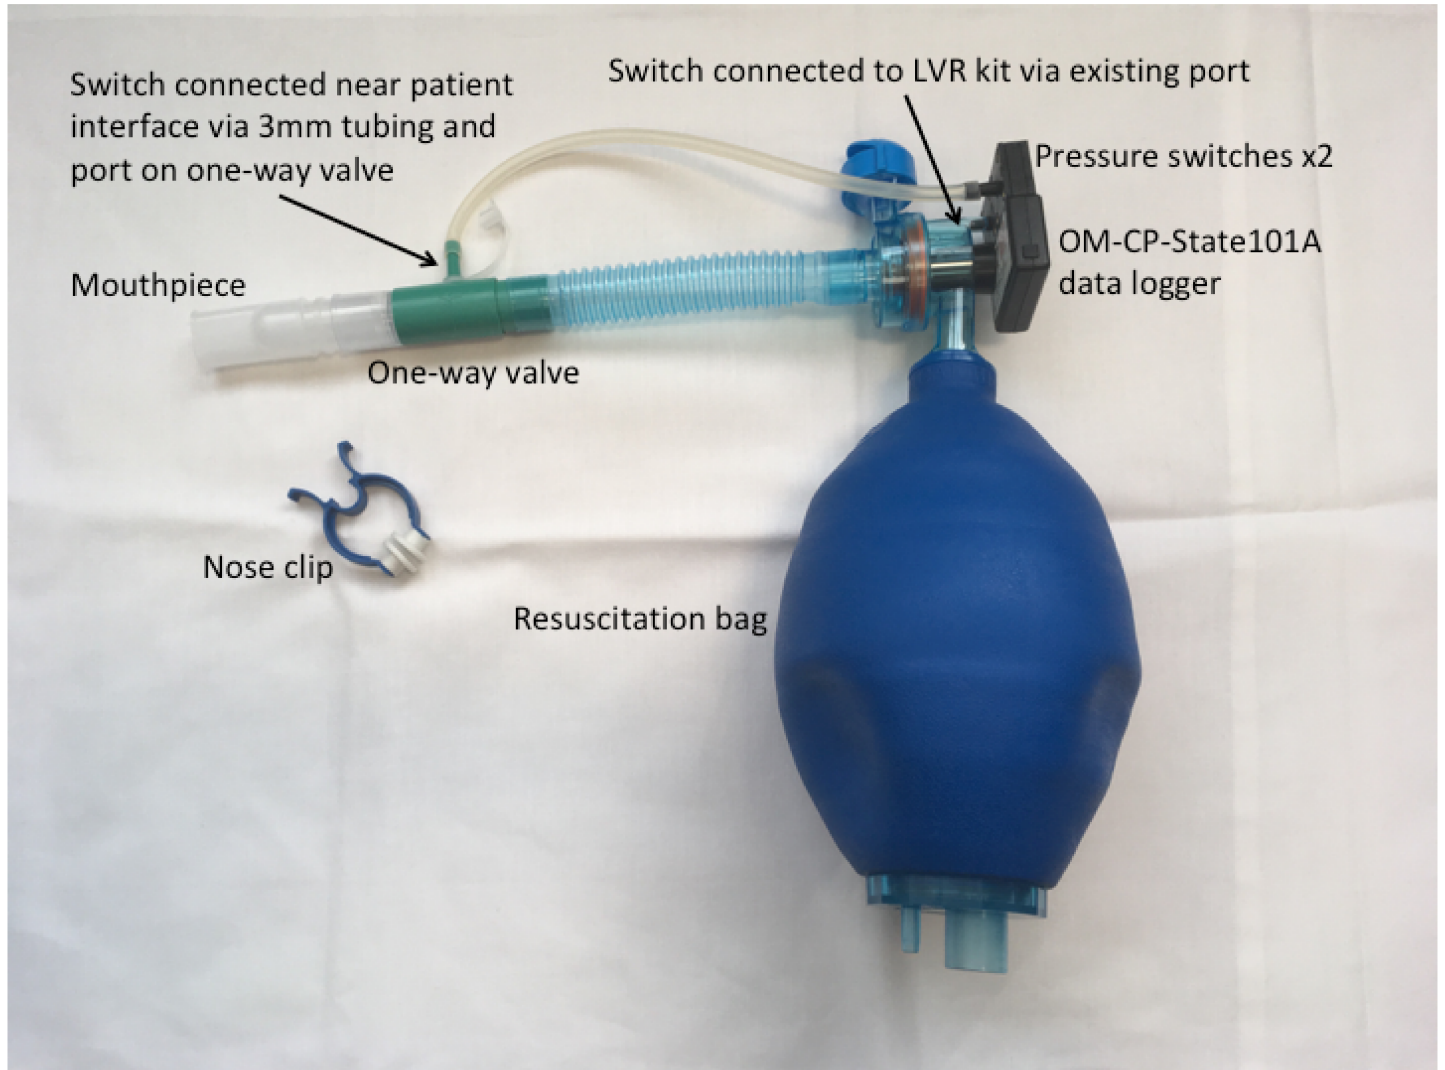

Supplement: bmjresp-2021-000918supp001_data_supplement.pdf [file bmjresp-2021-000918supp001_data_supplement.pdf]
